# Supplementary material for: Synthesis, reactivity and structural studies of selenide bridged carboranyl compounds
Source: Royal Society of Chemistry journal article supplement (doi:10.1039/b610944f), 2006-01-01
Supplement: b610944f.pdf [file b610944f.pdf]

## **Supporting Information**

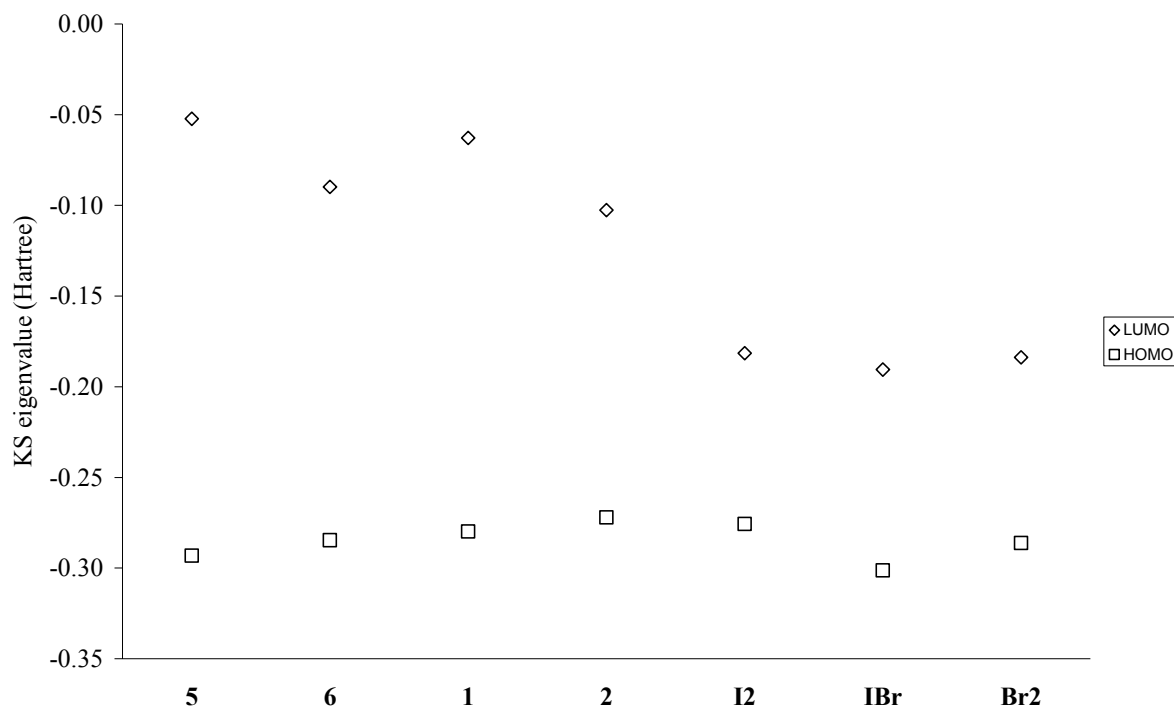

**Figure S1.** Kohn-Sham HOMO and LUMO eigenvalues calculated for (2-Me-1,2-*closo*-C<sub>2</sub>B<sub>10</sub>H<sub>10</sub>)<sub>2</sub>Se (**1**), (1-Se-2-Me-1,2-*closo*-C<sub>2</sub>B<sub>10</sub>H<sub>10</sub>)<sub>2</sub> (**2**), (2-Me-1,2-*closo*-C<sub>2</sub>B<sub>10</sub>H<sub>10</sub>)<sub>2</sub>S (**5**), and (1-S-2-Me-1,2-*closo*-C<sub>2</sub>B<sub>10</sub>H<sub>10</sub>)<sub>2</sub> (**6**), I<sub>2</sub>, IBr and Br<sub>2</sub> (Functional B3LYP; Ahlrichs, Horn and Schafer pVDZ basis sets for H, B, C, S and Se; LanL2DZ with relativistic effective core potentials for I and Br).

**Table S1.** Selected optimized<sup>a</sup> and average experimental<sup>b,c</sup> bond lengths (Å), angles (deg), and dihedrals (°) for (2-Me-1,2-*closo*-C<sub>2</sub>B<sub>10</sub>H<sub>10</sub>)<sub>2</sub>Se (**1**), (1-Se-2-Me-1,2-*closo*-C<sub>2</sub>B<sub>10</sub>H<sub>10</sub>)<sub>2</sub> (**2**), (2-Me-1,2-*closo*-C<sub>2</sub>B<sub>10</sub>H<sub>10</sub>)<sub>2</sub>S (**5**), and (1-S-2-Me-1,2-*closo*-C<sub>2</sub>B<sub>10</sub>H<sub>10</sub>)<sub>2</sub> (**6**).

|                             | Optimized |          |          |          | Experimental          |                       |                       |                       |
|-----------------------------|-----------|----------|----------|----------|-----------------------|-----------------------|-----------------------|-----------------------|
|                             | <b>1</b>  | <b>2</b> | <b>5</b> | <b>6</b> | <b>1</b> <sup>a</sup> | <b>2</b> <sup>a</sup> | <b>5</b> <sup>b</sup> | <b>6</b> <sup>b</sup> |
| <b>C-E</b>                  | 1.963     | 1.971    | 1.814    | 1.819    | 1.935                 | 1.952                 | 1.788                 | 1.788                 |
| <b>C-C</b>                  | 1.715     | 1.716    | 1.723    | 1.728    | 1.706                 | 1.702                 | 1.711                 | 1.711                 |
| <b>E-E</b>                  | -         | 2.344    | -        | 2.087    | -                     | 2.301                 | -                     | 2.030                 |
| <b>C-CH<sub>3</sub></b>     | 1.517     | 1.518    | 1.516    | 1.517    | 1.513                 | 1.517                 | 1.519                 | 1.526                 |
| <b>C-E-C</b>                | 110.99    | -        | 113.61   | -        | 110.11                | -                     | 113.12                | -                     |
| <b>E-C-C</b>                | 118.96    | 117.50   | 118.39   | 116.76   | 117.59                | 116.75                | 117.29                | 116.06                |
| <b>C-E-E</b>                | -         | 104.08   | -        | 105.88   | -                     | 102.70                | -                     | 105.70                |
| <b>C-C-CH<sub>3</sub></b>   | 119.51    | 120.00   | 119.00   | 119.50   | 118.9                 | 119.10                | 118.33                | 118.42                |
| <b>C-C-E-C</b>              | 96.06     | -        | 96.79    | -        | 96.39                 | -                     | 97.56                 | -                     |
| <b>C-E-E-C</b>              | -         | 103.32   | -        | 105.86   | -                     | 99.1                  | -                     | 105.10                |
| <b>E-C-C-CH<sub>3</sub></b> | 11.62     | 5.89     | 12.19    | 6.09     | 11.6                  | 5.1                   | 12.29                 | 4.09                  |
| <b>C-C-E-E</b>              | -         | 107.94   | -        | 107.00   | -                     | 109.8                 | -                     | 107.29                |

<sup>a</sup> Calculated at DFT level (B3LYP functional; Ahlrichs pVDZ basis set); <sup>b</sup> this work; <sup>c</sup> See ref. 37.

**Table S2.** Selected NBO charges (e) and Wiberg bond indexes for (2-Me-1,2-*closo*-C<sub>2</sub>B<sub>10</sub>H<sub>10</sub>)<sub>2</sub>Se (**1**), (1-Se-2-Me-1,2-*closo*-C<sub>2</sub>B<sub>10</sub>H<sub>10</sub>)<sub>2</sub> (**2**), (2-Me-1,2-*closo*-C<sub>2</sub>B<sub>10</sub>H<sub>10</sub>)<sub>2</sub>S (**5**), and (1-S-2-Me-1,2-*closo*-C<sub>2</sub>B<sub>10</sub>H<sub>10</sub>)<sub>2</sub> (**6**).<sup>a</sup>

|          | <b>Q<sub>E</sub><sup>b</sup></b> | <b>Q<sub>C(E)</sub><sup>b</sup></b> | <b>Q<sub>C(Me)</sub></b> | <b>WBI<sub>C-C</sub></b> | <b>WBI<sub>E-E</sub><sup>b</sup></b> | <b>WBI<sub>C-C(Me)</sub></b> |
|----------|----------------------------------|-------------------------------------|--------------------------|--------------------------|--------------------------------------|------------------------------|
| <b>1</b> | 0.604                            | -0.675                              | -0.454                   | 0.643                    | -                                    | 0.990                        |
| <b>2</b> | 0.311                            | -0.674                              | -0.458                   | 0.644                    | 1.08                                 | 0.990                        |
| <b>5</b> | 0.423                            | -0.603                              | -0.452                   | 0.634                    | -                                    | 0.991                        |
| <b>6</b> | 0.224                            | -0.608                              | -0.455                   | 0.630                    | 1.06                                 | 0.991                        |

<sup>a</sup> Calculated at DFT level (B3LYP functional; Ahlrichs pVDZ basis set); <sup>b</sup> E = Se (**1**, **2**), S (**5**, **6**).
